# Supplementary material
Source: Springer Nature journal article supplement (https://www.springermedizin.de/resource/supplementary/12960_2009_212_MOESM1_ESM.pdf/9570674)
Supplement: MOESM1 [file 9570674]

**Mission**

**Vision**

**Measurable result:**

---

**Priority  
actions**

---

---

---

---

---

---

---

**Obstacles and  
root causes**

**Current situation:**

---

**Challenge:**

---

( How will we achieve our desired result in light of the obstacles we need to overcome? )
